# Supplementary material
Source: Research Square preprint supplement (doi:10.21203/rs.3.rs-9306549/v1)
Supplement: Supplementary file 1 [file 85af20036857a487a31aa777.xlsx]

## Sheet: Pyroxene
EMPA Analyses: Pyroxene
Analyses	5 / 1 .	11 / 1 .	15 / 1 .	17 / 1 .	27 / 1 .	30 / 1 .	31 / 1 .	34 / 1 .	36 / 1 .	39 / 1 .	41 / 1 .	53 / 1 .	56 / 1 .	58 / 1 .	61 / 1 .	64 / 1 .	67 / 1 .	69 / 1 .	72 / 1 .	76 / 1 .	80 / 1 .	85 / 1 .	87 / 1 .	88 / 1 .	49 / 1 .
SiO2	46.4158	49.6147	49.2802	48.3929	48.5581	47.8436	52.2399	47.7524	52.632	52.999	49.5205	49.4329	50.8976	50.4417	50.8402	49.2713	50.455	49.3137	49.1657	50.1454	49.2963	47.2228	50.8652	49.3112	48.0721
Al2O3	10.7745	11.1566	12.4325	8.0448	16.6498	14.7764	5.6268	8.1462	14.2861	4.6997	11.817	8.2214	11.6277	6.3816	11.4579	8.428	10.6992	22.1256	8.8912	9.7308	7.6232	22.127	17.8868	8.0846	9.5475
Cr2O3	-0.0249	0.0727	0.0521	0.0689	-0.0193	0.0597	-0.0035	0.0322	0.0363	0.0086	0.0712	0.0857	0.0176	-0.0018	0.0715	0.0121	0.1077	0.0572	0.0692	0.0572	0.1075	0.04	0.0035	0.0034	-0.0069
FeO	16.0099	4.2149	3.8274	6.2807	3.464	4.2468	7.7845	12.219	7.3593	6.6842	3.3403	4.1662	2.9672	4.8902	3.6262	5.2921	3.379	2.4918	6.1903	3.9277	6.4482	2.6497	2.2121	7.0433	8.295
MnO	0.6429	0.0865	0.0568	0.1935	0.0438	0.003	0.0783	0.1043	0.0602	0.0389	0.0523	0.0181	0.0181	0.0574	0.021	0.0447	0.0359	0.0253	0.0434	0.0194	0.0405	0.0359	0	0.0714	0.1063
MgO	19.9421	12.8634	12.0077	13.0762	10.9451	11.3181	19.4588	20.8442	18.4213	18.1013	11.8844	12.1798	10.7378	13.5634	11.2295	12.8141	12.0169	8.3254	12.6568	11.6627	12.7608	9.2395	8.2389	14.7182	12.6178
CaO	3.1204	20.245	20.1801	19.4164	18.1669	18.4172	12.3293	6.9053	7.5032	14.9522	19.134	20.4958	19.6352	20.3967	19.1771	19.8037	19.2686	15.222	18.696	19.6929	19.8799	15.2495	15.3785	16.9107	17.2723
Na2O	0.0217	1.2298	1.3517	0.8894	1.1612	1.7311	0.8378	0.1748	1.2894	1.0308	1.7983	1.9042	2.2113	1.3641	2.3215	1.2504	1.8685	2.2437	1.0787	2.1993	1.1593	1.3385	2.4408	1.066	0.9904
K2O	0.0047	0.0215	0.0165	0.0103	0.2432	0.1275	0.0064	0.0191	0.1293	0.008	0.4833	0.1106	0.5671	0.0301	0.2842	0.0598	0.7944	0.2514	0.4774	0.6647	0.0224	0.2291	0.1792	0.0161	0.005
TiO2	0.0035	0.4632	0.4346	0.4088	0.3737	1.225	0.1742	0.1375	0.1711	0.2277	0.978	0.9223	0.7521	0.5208	0.9443	0.6564	1.0053	0.4022	0.4083	0.9924	0.7396	0.5038	0.4192	0.4824	0.2678
Total	96.9106	99.9683	99.6396	96.7819	99.5865	99.7484	98.5325	96.335	101.888	98.7504	99.0793	97.537	99.4317	97.6442	99.9734	97.6326	99.6305	100.458	97.677	99.0925	98.0777	98.6358	97.6242	97.7073	97.1673
	Normalized to 4 cations
Si	1.74904	1.80339	1.79667	1.83154	1.77019	1.74125	1.90957	1.79141	1.84676	1.93863	1.81064	1.8422	1.85529	1.8813	1.84349	1.84203	1.83542	1.77331	1.84105	1.83506	1.84373	1.73361	1.88678	1.83819	1.81762
Al	0.478504	0.477932	0.534207	0.358844	0.715354	0.633811	0.242409	0.360172	0.590785	0.202606	0.509224	0.361096	0.499533	0.280512	0.489658	0.371348	0.458709	0.937707	0.39239	0.419683	0.336027	0.957361	0.781967	0.355188	0.425457
Cr	-0.000741839	0.00208925	0.00150179	0.00206173	-0.000556277	0.00171786	-0.000101153	0.000955064	0.00100703	0.000248716	0.00205828	0.0025251	0.00050723	-5.30782e-05	0.00204982	0.000357655	0.00309759	0.00162626	0.00204874	0.00165497	0.00317883	0.00116101	0.000102647	0.000100208	-0.00020627
Fe2+	0.478761	0.128125	0.116699	0.180306	0.10561	0.129261	0.237975	0.321436	0.215956	0.204478	0.102141	0.0867461	0.0904545	0.124736	0.109965	0.164658	0.102799	0.0749375	0.192279	0.0792243	0.184835	0.0813511	0.0686237	0.200493	0.262298
Fe3+	0.0257734	0	0	0.0184919	0	0	0	0.0619208	0	0	0	0.0431004	0	0.0277962	0	0.000803698	0	0	0.00157899	0.0409814	0.016857	0	0	0.019085	0
Mn	0.0205193	0.00266307	0.001754	0.00620301	0.00135244	9.24792e-05	0.00242427	0.00331413	0.00178914	0.00120521	0.0016197	0.000571329	0.00055883	0.00181328	0.000644968	0.00141545	0.00110614	0.000770591	0.00137651	0.000601321	0.00128299	0.0011163	0	0.00225439	0.00340432
Mg	1.12025	0.697022	0.652629	0.737781	0.594823	0.614074	1.06037	1.16572	0.96359	0.987071	0.647791	0.676663	0.583501	0.754131	0.607021	0.714169	0.651679	0.446307	0.706542	0.63625	0.711493	0.505659	0.455597	0.817919	0.711222
Ca	0.125985	0.788445	0.788303	0.787369	0.709598	0.718182	0.482886	0.27756	0.282086	0.586013	0.749596	0.818391	0.766875	0.815082	0.745058	0.793272	0.751026	0.586494	0.750112	0.772151	0.796655	0.59983	0.611208	0.67543	0.699737
Na	0.0015854	0.0866679	0.0955478	0.0652645	0.0820745	0.122153	0.0593768	0.0127141	0.0877189	0.0731049	0.127483	0.137587	0.156281	0.0986411	0.16321	0.0906348	0.131786	0.156432	0.0783156	0.156044	0.0840663	0.0952711	0.175541	0.0770453	0.0726049
K	0.00022594	0.000996963	0.000767434	0.000497317	0.0113105	0.00591981	0.000298451	0.000914101	0.0057879	0.000373318	0.0225437	0.00525821	0.0263716	0.00143217	0.0131467	0.0028521	0.0368664	0.011533	0.0228059	0.0310317	0.00106879	0.0107296	0.00848008	0.000765653	0.00024118
Ti	9.92211e-05	0.0126663	0.0119203	0.0116399	0.010249	0.0335409	0.00479052	0.00388065	0.00451662	0.00626604	0.0269022	0.0258581	0.020625	0.014613	0.02576	0.0184618	0.0275124	0.0108808	0.0115023	0.0273217	0.0208104	0.0139142	0.0116984	0.0135287	0.0076177
Sum	4	4	4	4	4	4	4	4	4	4	4	4	4	4	4	4	4	4	4	4	4	4	4	4	4
J	0.00317079	0.173336	0.191096	0.130529	0.164149	0.244305	0.118754	0.0254282	0.175438	0.14621	0.254967	0.275175	0.312563	0.197282	0.326419	0.18127	0.263571	0.312865	0.156631	0.312088	0.168133	0.190542	0.351081	0.154091	0.14521
Q	1.725	1.61359	1.55763	1.70546	1.41003	1.46152	1.78124	1.76472	1.46163	1.77756	1.49953	1.5818	1.44083	1.69395	1.46204	1.6721	1.5055	1.10774	1.64893	1.48763	1.69298	1.18684	1.13543	1.69384	1.67326
Fs	0.296425	0.0809207	0.0759615	0.118487	0.0757853	0.0885006	0.134779	0.211301	0.148792	0.115632	0.069121	0.0802338	0.0631428	0.0895506	0.0756207	0.0996689	0.0689659	0.0682972	0.118189	0.0789997	0.118621	0.0694196	0.0604386	0.129335	0.158471
En	0.632449	0.431257	0.418517	0.426426	0.421447	0.420136	0.594494	0.637023	0.65845	0.554919	0.431531	0.416287	0.404818	0.437543	0.415004	0.426543	0.432547	0.402619	0.427718	0.416065	0.415805	0.425654	0.401256	0.47687	0.424189
Wo	0.071126	0.487822	0.505522	0.455087	0.502768	0.491364	0.270728	0.151676	0.192758	0.329449	0.499348	0.503479	0.532039	0.472907	0.509375	0.473788	0.498487	0.529084	0.454094	0.504935	0.465574	0.504926	0.538306	0.393795	0.41734
Quad	0.998165	0.902998	0.890723	0.928905	0.895724	0.856781	0.937498	0.985795	0.892834	0.923998	0.854678	0.851816	0.821738	0.895686	0.817486	0.902194	0.851012	0.779766	0.913251	0.82659	0.90966	0.861664	0.763822	0.916615	0.920147
Jd	0.001741	0.0970022	0.109277	0.0676107	0.104276	0.143219	0.0625023	0.0121207	0.107166	0.0760017	0.145322	0.132383	0.178262	0.0949095	0.182514	0.0975943	0.148988	0.220234	0.0864015	0.157983	0.0860243	0.138336	0.236178	0.0791334	0.0798528
Ae	9.37745e-05	0	0	0.00348411	0	0	0	0.0020838	0	0	0	0.0158012	0	0.00940467	0	0.00021122	0	0	0.000347681	0.0154268	0.00431546	0	0	0.00425201	0

## Sheet: Plagioclase
EMPA Analyses: Plagioclase
Microstructure	PSTmatrixPlag	PSTmatrixPlag	PSTmatrixPlag	PSTmatrixPlag	PSTmatrixPlag	PSTmatrixPlag	PSTmatrixPlag	PSTmatrixPlagClast	PSTmatrixPlagClast	PSTmatrixPlagclast	PSTmatrixPlagclast	PSTmatrixPlagclast	PSTmatrixPlag	DMGZonePlag	DMGZonePlag	DMGZonePlag	DMGZonePlag	DMGZonePlag	DMGZonePlag	DMGZonePlag	DMGZonePlag	DMGZonePlag	DMGZonePlag	DMGZonePlag	DMGZonePlag	DMGZonePlag	DMGZonePlag	DMGZonePlag	DMGZonePlag	DMGZonePlag	DMGZonePlag	DMGZonePlag	DMGZonePlag	DMGZonePlag	DMGZonePlag_InjVeinSide	DMGZonePlag_InjVeinSide	DMGZonePlag_InjVeinSide	DMGZonePlag_InjVeinSide	DMGZonePlag_InjVeinSide	DMGZonePlag_InjVeinSide	DMGZonePlag_InjVeinSide	DMGZonePlag_InjVeinSide	DMGZonePlag_InjVeinSide	DMGZonePlag_InjVeinSide	DMGZonePlag_InjVeinSide	DMGZonePlag_InjVeinSide	DMGZonePlag_InjVeinSide	DMGZonePlag_InjVeinSide	DMGZonePlag_InjVeinSide
Element	31 / 1 .	32 / 1 .	33 / 1 .	34 / 1 .	35 / 1 .	36 / 1 .	37 / 1 .	38 / 1 .	40 / 1 .	51 / 1 .	52 / 1 .	53 / 1 .	64 / 1 .	73 / 1 .	74 / 1 .	75 / 1 .	75 / 2 .	75 / 3 .	75 / 4 .	75 / 5 .	75 / 6 .	75 / 7 .	75 / 8 .	75 / 9 .	75 / 10 .	75 / 11 .	75 / 12 .	76 / 1 .	76 / 2 .	76 / 3 .	76 / 4 .	76 / 5 .	76 / 6 .	76 / 7 .	82 / 1 .	82 / 2 .	82 / 4 .	82 / 5 .	82 / 6 .	82 / 7 .	82 / 8 .	82 / 10 .	82 / 11 .	82 / 12 .	83 / 1 .	83 / 2 .	83 / 3 .	83 / 4 .	83 / 5 .
Na2O	5.4882	5.9666	6.2657	6.7792	6.5788	6.6655	6.0567	5.9669	6.6954	6.4056	6.3419	6.5211	5.582	5.255	5.6941	5.4946	5.8329	5.5291	5.3388	5.6225	5.4937	5.6382	5.8297	5.3523	4.827	5.1022	5.5338	5.8072	5.374	5.6547	5.6798	5.6798	5.7975	5.6205	5.1444	5.1635	5.0547	5.0514	4.9486	5.1027	4.8916	5.2834	5.0031	5.1067	5.5273	5.4503	5.4431	5.4305	5.4167
SiO2	56.4235	54.7284	56.8325	58.2725	57.5403	57.6475	55.6643	55.626	57.6842	57.06	56.1682	56.9353	55.6249	54.6587	55.2341	54.7646	55.7029	54.9205	54.8929	55.3245	54.9366	55.3266	55.3776	54.908	54.0515	53.2604	55.2086	55.2398	55.1455	55.2637	55.3762	55.4513	55.3555	55.0572	53.0456	54.1669	53.624	53.8164	53.4538	54.2613	53.8766	54.1004	53.4159	53.4777	54.9067	54.8333	54.589	54.8282	55.3003
K2O	1.5205	0.2407	0.2738	0.4816	0.4527	0.3994	0.4603	0.328	0.3179	0.4401	0.2787	0.3492	1.2144	0.3237	0.3222	0.2432	0.3382	0.5244	0.3447	0.3842	0.3281	0.3945	0.2449	0.3171	0.2976	0.3468	0.3309	0.3335	0.3069	0.2822	0.3497	0.4847	0.4158	0.5716	0.2876	0.2861	0.2082	0.2718	0.2233	0.242	0.2346	0.321	0.2227	0.295	0.2184	0.2374	0.2279	0.2473	0.2677
CaO	8.1184	8.3658	8.3131	7.8744	8.1228	9.0489	8.1519	8.7469	8.6799	8.6994	8.2127	8.4627	7.8847	11.1508	9.8107	10.8254	10.3729	10.4578	10.895	10.5924	10.4292	10.5892	10.4698	11.0752	12.284	11.5923	10.3826	10.398	11.0555	10.1618	10.2054	10.3154	10.4614	10.2898	8.8612	11.2653	11.7546	11.476	11.5434	11.667	12.0205	10.8954	11.7232	11.1273	11.0445	10.8697	10.7741	10.9206	10.9113
TiO2	0.0358	-0.0037	0.0749	0.0093	0.2628	0.0344	0.0177	0.0163	-0.028	0.0089	0.0329	0.0195	0.0032	0.0092	0.0078	0.0092	0.018	-0.0124	0.0055	-0.0014	0.0041	0.0258	0.017	-0.0143	0.0134	-0.0171	-0.0023	0.0183	-0.0113	0.0017	0.0631	0.0971	0.02	0.0357	0.0153	0.0144	0.0446	0.0472	0.0206	-0.0013	-0.0057	0.0166	0.0245	0.0004	0.0131	0.024	0.0144	0.0498	0.0267
FeO	0.3595	0.3089	0.1399	0.2978	0.2056	0.4927	0.2045	0.2902	0.1707	0.127	0.1743	0.083	0.1679	0.0684	0.0372	-0.0001	0.0163	0.0356	0.0059	-0.0325	0.0161	0.0048	-0.0117	0.0067	-0.0229	0.1084	-0.0055	0.0446	0.0186	0.0129	-0.0026	0.0504	0.017	0.0256	0.1109	0.0141	-0.0205	0.001	0.0326	0.051	0.0158	-0.0107	0.0086	0.0023	0.0429	0.0214	-0.0048	0.0035	-0.0015
Al2O3	26.8839	29.9544	28.184	24.9429	26.1	25.3724	28.6947	28.789	26.5549	26.829	28.1396	27.2979	28.9886	28.2533	28.2463	28.1053	27.6727	27.5221	27.7922	27.772	27.4308	27.8315	27.9778	28.0509	28.7598	27.2792	27.847	28.1315	27.9198	27.6502	27.7976	27.6233	27.3359	27.4446	30.8881	28.012	28.4816	28.6901	28.6861	28.65	28.8342	28.0196	28.8751	28.532	27.9721	27.9381	28.1113	28.0847	27.9614
MgO	0.6365	0.0225	-0.0295	0.346	0.1149	0.5293	0.2527	0.0156	0.007	0.0514	0.0173	-0.0147	0.0318	-0.0273	-0.0359	0.0043	-0.0266	0.0111	-0.0291	-0.0274	-0.0026	-0.03	-0.0043	-0.0137	-0.0111	0.3398	-0.0317	-0.0356	-0.0258	-0.0097	-0.0186	-0.0324	-0.0049	-0.0259	0.0306	-0.0121	-0.0251	0.0105	-0.004	-0.0105	-0.0267	-0.0122	-0.0073	-0.0178	-0.017	-0.0178	-0.0097	0	-0.0268
MnO	-0.0365	0.0015	0.0122	0.0031	0.0168	-0.003	-0.0122	0.0137	-0.0046	-0.0122	0.0091	-0.0061	0.0243	-0.0347	-0.0015	-0.0136	-0.0302	-0.0121	0.0045	0.0256	-0.0106	0	0.0075	0.0226	-0.0226	0.0151	0.0151	0.0071	0.0043	-0.0257	0.0086	-0.0114	0.0114	-0.0043	-0.0071	0.01	-0.0172	0.0501	-0.0229	-0.0158	-0.01	-0.0186	-0.0186	0.0201	0.04	-0.0143	0.0229	0.0143	-0.0043
Cr2O3	0	-0.0178	0.0178	-0.0071	-0.0089	0.0355	0.0196	0.0302	-0.0107	0.0071	0.023	0.0053	0.0195	-0.0035	0	-0.0281	0.0158	-0.0106	-0.0123	0.0018	-0.0158	-0.0088	-0.051	-0.007	-0.0176	-0.0035	-0.0158	0.0133	0.01	0.0366	-0.0116	0.005	-0.01	0.0133	0.025	0.0567	0.0167	-0.0033	0.0184	-0.0134	0.0501	0.0351	-0.0134	-0.0184	0.0067	0.0067	-0.0083	0	0.005
Total	99.4661	99.5888	100.114	99.0069	99.3946	100.226	99.5224	99.8229	100.11	99.6284	99.3978	99.6741	99.5414	99.719	99.3524	99.4465	99.9697	99.0006	99.2795	99.723	98.6386	99.8106	99.9245	99.7328	100.233	98.0441	99.318	99.9932	99.8346	99.0639	99.4803	99.7071	99.4145	99.0583	98.4085	98.989	99.1844	99.4147	98.9267	99.9739	99.9233	98.6715	99.2732	98.5615	99.7715	99.3808	99.1826	99.579	99.8892
Structural formula - Number of ions on the basis of 8 oxygen equivalents
Si_T	2.55628	2.46517	2.54386	2.63791	2.60146	2.59441	2.50892	2.50302	2.58593	2.57125	2.53314	2.56202	2.50932	2.47746	2.50189	2.48521	2.51397	2.50449	2.49582	2.50418	2.5103	2.50238	2.49969	2.4864	2.4441	2.46372	2.50512	2.49412	2.49415	2.51296	2.50948	2.51213	2.51406	2.51046	2.41813	2.47458	2.44919	2.44931	2.44459	2.45546	2.44252	2.47752	2.43615	2.45243	2.48674	2.49077	2.48357	2.48593	2.49805
Al_T	1.43545	1.59017	1.48678	1.33073	1.3907	1.34576	1.52426	1.52672	1.40298	1.42483	1.49567	1.4477	1.54121	1.50926	1.50789	1.50314	1.47191	1.47916	1.48925	1.4815	1.47724	1.48356	1.48838	1.49703	1.53265	1.48719	1.48918	1.49694	1.48824	1.4818	1.48462	1.47487	1.46318	1.47484	1.65947	1.5082	1.53312	1.53889	1.54613	1.52797	1.54061	1.51226	1.55204	1.54207	1.49306	1.49566	1.5073	1.50073	1.48861
Sum_T	3.99173	4.05534	4.03064	3.96865	3.99216	3.94017	4.03318	4.02974	3.98892	3.99608	4.02881	4.00972	4.05053	3.98672	4.00977	3.98835	3.98588	3.98365	3.98507	3.98568	3.98754	3.98594	3.98807	3.98343	3.97675	3.9509	3.9943	3.99106	3.98239	3.99476	3.9941	3.987	3.97724	3.9853	4.0776	3.98279	3.98231	3.9882	3.99073	3.98343	3.98313	3.98979	3.98819	3.9945	3.9798	3.98644	3.99087	3.98666	3.98666
Fe2_M1	0.0136209	0.0116362	0.0052369	0.0112741	0.00777371	0.0185439	0.00770839	0.0109205	0.00639962	0.00478603	0.00657395	0.00312348	0.00633428	0.00259276	0.00140917	-3.7951e-06	0.000615219	0.00135767	0.000224341	-0.00123024	0.000615248	0.00018156	-0.00044167	0.000253729	-0.000865976	0.00419349	-0.00020871	0.00168407	0.000703534	0.000490563	-9.85357e-05	0.00190951	0.000645691	0.000976202	0.00422787	0.000538701	-0.000783029	3.80617e-05	0.00124683	0.00193007	0.000599038	-0.00040979	0.000328013	8.82087e-05	0.00162488	0.000812949	-0.00018263	0.000132713	-5.66663e-05
Mn_M1	-0.00140062	5.72275e-05	0.000462525	0.00011886	0.00064333	-0.000114356	-0.000465746	0.000522138	-0.000174661	-0.00046564	0.000347608	-0.000232493	0.000928478	-0.00133216	-5.7548e-05	-0.000522735	-0.00115443	-0.000467357	0.000173296	0.000981445	-0.00041025	0	0.000286742	0.000866808	-0.000865561	0.000591619	0.000580333	0.00027152	0.000164725	-0.000989822	0.000330094	-0.000437436	0.00043853	-0.000166068	-0.000274137	0.000386943	-0.000665382	0.00193128	-0.000887038	-0.00060559	-0.000383987	-0.000721455	-0.000718496	0.000780726	0.00153442	-0.00055018	0.000882441	0.000549162	-0.000164521
Mg_M1	0.0429883	0.00151085	-0.00196844	0.0233494	0.00774406	0.0355111	0.0169793	0.00104644	0.000467802	0.00345286	0.00116311	-0.000986103	0.00213854	-0.00184465	-0.00242414	0.000290894	-0.00178965	0.00075459	-0.00197239	-0.00184885	-0.000177109	-0.00202276	-0.00028935	-0.000924826	-0.000748233	0.0234322	-0.00214429	-0.00239617	-0.00173954	-0.000657537	-0.00125654	-0.00218816	-0.000331753	-0.00176053	0.00207948	-0.000824057	-0.001709	0.000712396	-0.000272704	-0.00070833	-0.00180448	-0.000832877	-0.000496317	-0.00121688	-0.00114778	-0.00120535	-0.00065788	0	-0.00180473
Ca_M1	0.394078	0.403744	0.398679	0.381925	0.393473	0.436333	0.393671	0.4217	0.416907	0.420015	0.396843	0.408013	0.381097	0.541523	0.476128	0.526346	0.501587	0.510962	0.530748	0.513695	0.510598	0.513153	0.506354	0.537342	0.595133	0.574539	0.504768	0.503012	0.53574	0.495085	0.495512	0.500703	0.50906	0.502702	0.4328	0.55141	0.575222	0.559607	0.565621	0.565674	0.58388	0.534594	0.572852	0.546735	0.535938	0.529019	0.52519	0.530513	0.528097
Na_M1	0.482076	0.521073	0.543755	0.594994	0.576672	0.581605	0.529277	0.520561	0.581934	0.55964	0.554531	0.568931	0.488218	0.461803	0.50006	0.483433	0.510392	0.488851	0.470628	0.493417	0.486705	0.494421	0.510194	0.469909	0.42318	0.457595	0.486835	0.508357	0.471245	0.498531	0.499034	0.498885	0.510497	0.49688	0.454676	0.457351	0.447607	0.445736	0.438781	0.447693	0.429957	0.469103	0.442394	0.454047	0.48535	0.480007	0.480125	0.477378	0.474401
K_M1	0.0878797	0.0138314	0.0156345	0.0278123	0.0261102	0.0229308	0.026467	0.0188284	0.0181805	0.0252998	0.0160347	0.0200461	0.0698879	0.0187173	0.0186183	0.0140793	0.019472	0.0305071	0.0199937	0.0221849	0.019126	0.0227625	0.0141024	0.0183183	0.0171671	0.0204654	0.0191546	0.0192094	0.0177077	0.0163703	0.0202167	0.0280128	0.0240909	0.0332496	0.0167253	0.016674	0.0121311	0.0157809	0.0130278	0.0139705	0.0135681	0.0187532	0.0129571	0.0172584	0.0126186	0.013757	0.0132272	0.0143042	0.0154268
Ba_M1	0	0	0	0	0	0	0	0	0	0	0	0	0	0	0	0	0	0	0	0	0	0	0	0	0	0	0	0	0	0	0	0	0	0	0	0	0	0	0	0	0	0	0	0	0	0	0	0	0
Sum	5.01097	5.00719	4.99244	5.00812	5.00458	5.03498	5.00682	5.00332	5.01263	5.00881	5.00431	5.00862	4.99913	5.00817	5.00351	5.01197	5.01501	5.01561	5.00487	5.01288	5.004	5.01443	5.01827	5.0092	5.00975	5.03172	5.00329	5.0212	5.00621	5.00359	5.00784	5.01388	5.02164	5.01718	4.98783	5.00833	5.01412	5.012	5.00824	5.01138	5.00894	5.01027	5.01551	5.01219	5.01572	5.00828	5.00946	5.00954	5.00256
Xan	0.408781	0.430133	0.416128	0.380127	0.394952	0.419201	0.414645	0.438773	0.409929	0.417944	0.410213	0.409245	0.405767	0.529843	0.478614	0.514081	0.486293	0.495926	0.519643	0.499074	0.502345	0.498044	0.491296	0.523946	0.574741	0.545829	0.499395	0.488087	0.52283	0.49019	0.488303	0.487254	0.48777	0.486722	0.478654	0.537733	0.555792	0.54803	0.555931	0.550621	0.568305	0.522856	0.557139	0.537047	0.518362	0.517235	0.515629	0.518994	0.518798
Xab	0.500061	0.555131	0.567553	0.592192	0.57884	0.558769	0.557477	0.541636	0.572195	0.556881	0.573213	0.570648	0.519821	0.451843	0.502671	0.472168	0.494829	0.474465	0.460781	0.479373	0.478838	0.479864	0.495021	0.458193	0.40868	0.434728	0.481654	0.493273	0.459889	0.493602	0.491774	0.485485	0.489147	0.481085	0.502849	0.446007	0.432487	0.436515	0.431264	0.43578	0.418488	0.458802	0.430259	0.446001	0.469433	0.469315	0.471385	0.467013	0.466047
Xor	0.0911583	0.0147354	0.0163188	0.0276814	0.0262083	0.0220305	0.0278772	0.0195907	0.0178762	0.0251751	0.0165749	0.0201066	0.074412	0.0183136	0.0187155	0.0137512	0.0188782	0.0296094	0.0195753	0.0215535	0.0188169	0.0220923	0.0136831	0.0178616	0.0165789	0.0194427	0.0189507	0.0186395	0.017281	0.0162084	0.0199226	0.0272604	0.0230834	0.0321926	0.0184973	0.0162604	0.0117213	0.0154545	0.0128046	0.0135988	0.0132062	0.0183415	0.0126017	0.0169525	0.0122048	0.0134506	0.0129864	0.0139936	0.0151551

## Sheet: Garnet
EMPA Analyses: Garnet
Microstructure	CoronaGrt	CoronaGrt	CoronaGrt	CoronaGrt	CoronaGrt	CoronaGrt	CoronaGrt	CoronaGrt	PSTmatrixGrt	PSTmatrixGrt	PSTmatrixGrt	CoronaGrt	CoronaGrt	CoronaGrt	PSTmatrixGrt	PSTmatrixGrt	PSTmatrixGrt	PSTmatrixGrt
Element	3 / 1 .	4 / 1 .	5 / 1 .	6 / 1 .	8 / 1 .	9 / 1 .	10 / 1 .	11 / 1 .	13 / 1 .	14 / 1 .	15 / 1 .	58 / 1 .	60 / 1 .	61 / 1 .	62 / 1 .	63 / 1 .	66 / 1 .	68 / 1 .
Na2O	0.0215	-0.0133	0.009	0.0249	-0.0028	0.0119	-0.0007	0.0828	0.0664	-0.0111	0.1033	0.0019	-0.0075	0.0007	0.065	0.0507	-0.0069	-0.0034
SiO2	39.2819	39.5836	39.9288	39.4335	39.0643	39.2844	39.5938	40.049	40.0153	39.7227	40.6839	49.3184	40.1074	38.1255	41.23	40.3357	39.4321	40.8621
K2O	-0.0155	0.0294	0.0339	0.0062	0.0017	0.1522	0.0042	0.0113	0.0021	0.0173	0.0029	0.0038	0.0058	0.0059	0.0122	0.029	0.0021	0.0013
CaO	6.0598	5.4531	5.8369	6.6736	6.5394	6.589	7.3749	7.2168	7.174	6.4222	8.5406	0.8513	5.1552	5.3308	6.5071	6.7298	6.5124	5.3209
TiO2	0.0328	0.011	0.0144	0.0257	0.0367	0.0557	0.0147	0.0382	0.0769	0.0427	0.0439	0.065	-0.0083	0.0418	0.0444	0.0333	0.0659	0.062
FeO	20.0023	20.681	20.7937	20.765	20.8958	20.6626	19.6219	19.59	19.7911	20.1606	18.3041	14.5752	20.1463	21.3321	19.2949	19.1946	19.7403	19.3182
Al2O3	21.9861	22.0885	21.0154	21.7536	21.6793	21.8386	22.0565	22.0016	21.7138	22.0591	20.0061	8.5167	21.5205	23.0185	20.8033	21.165	21.8747	21.3003
MgO	10.3293	10.0377	10.3057	9.3714	9.5272	9.2925	10.2776	10.1119	10.4471	10.4894	10.6487	25.7949	11.3011	10.1034	11.7714	11.6021	10.8178	11.9789
MnO	0.7226	1.3268	1.3031	1.2858	1.1062	1.3805	0.5483	0.4998	0.4473	0.4343	0.3817	0.2657	1.0856	1.2536	0.3189	0.297	0.3473	0.2992
Cr2O3	0.0115	-0.0345	0.0081	0.0032	-0.0099	0.0082	0.0496	-0.0099	0	0.0231	0.005	-0.0133	0.0016	0.0016	0.0116	0.0149	0.028	0.0379
TOTAL	98.4478	99.2111	99.2488	99.3427	98.8505	99.2755	99.5414	99.6014	99.7342	99.3714	98.7202	99.393	99.3235	99.2139	100.059	99.4521	98.8205	99.1807
Structural formula - Number of ions on the basis of 8 oxygen equivalents
Si_T	3	3	3	3	3	3	3	3	3	3	3	3	3	2.91993	3	3	3	3
Al_T	0	0	0	0	0	0	0	0	0	0	0	0	0	0.0800722	0	0	0	0
Sum_T	3	3	3	3	3	3	3	3	3	3	3	3	3	3	3	3	3	3
Si_Oct	0.00730266	0.0177329	0.0487854	0.0146875	0.00271958	0.0094847	0.000345954	0.027672	0.024068	0.0117882	0.0984813	0.574733	0.0388302	0	0.0863371	0.0439262	0.00306302	0.0746134
Al_Oct	1.98372	1.98463	1.89115	1.96	1.96394	1.97172	1.96983	1.96028	1.93397	1.97116	1.79571	0.727534	1.92168	1.99762	1.83531	1.88239	1.96338	1.88887
Ti_Oct	0.00188909	0.00063089	0.000827177	0.0014781	0.00212225	0.00321013	0.000838024	0.00217258	0.00437207	0.00243562	0.00251528	0.0035444	-0.000473102	0.0024084	0.00250039	0.00189053	0.00377568	0.00350959
Cr_Oct	0.000696068	-0.00207948	0.000488984	0.000193418	-0.000601644	0.000496656	0.00297163	-0.000591728	0	0.00138474	0.000301069	-0.000762177	9.58454e-05	9.68826e-05	0.000686527	0.000888997	0.00168594	0.00225465
Mg_Oct	0.00639219	0	0.0587493	0.023643	0.031823	0.0150927	0.0260166	0.0104635	0.037594	0.0132356	0.102992	0.69495	0.0398638	0	0.0751646	0.0709013	0.0280963	0.030748
Fe_Oct	0	0	0	0	0	0	0	0	0	0	0	0	0	0	0	0	0	0
Mn_Oct	0	0	0	0	0	0	0	0	0	0	0	0	0	0	0	0	0	0
Sum_Oct	2	2.00091	2	2	2	2	2	2	2	2	2	2	2	2.00012	2	2	2	2
Y_Dod	0	0	0	0	0	0	0	0	0	0	0	0	0	0	0	0	0	0
Mg_Dod	1.17246	1.14078	1.11431	1.04439	1.05988	1.04613	1.135	1.12914	1.13937	1.17237	1.10601	2.09227	1.23659	1.15353	1.23843	1.23432	1.20007	1.31291
Fe_Dod	1.28063	1.31855	1.3278	1.3276	1.34324	1.32378	1.2435	1.23854	1.25082	1.27835	1.16583	0.883505	1.27655	1.36631	1.2079	1.21139	1.25727	1.21562
Mn_Dod	0.0468556	0.0856741	0.0842747	0.0832586	0.072019	0.0895751	0.0351918	0.0320031	0.0286314	0.0278904	0.0246222	0.0163119	0.0696676	0.0813194	0.0202192	0.0189837	0.0224026	0.0190682
Ca_Dod	0.497058	0.445423	0.477515	0.546639	0.538563	0.540823	0.598776	0.584555	0.580886	0.521715	0.696913	0.0661121	0.418496	0.437434	0.521893	0.54414	0.531397	0.428962
Na_Dod	0.00319125	-0.00196587	0.00133236	0.00369074	-0.000417282	0.00176749	-0.000102844	0.0121363	0.00972905	-0.00163172	0.0152533	0.000267009	-0.00110174	0.000103942	0.00943366	0.00741805	-0.00101883	-0.000496005
Sum_Dod	3.0002	2.98847	3.00523	3.00558	3.01328	3.00208	3.01236	2.99638	3.00944	2.99869	3.00862	3.05847	3.0002	3.0387	2.99788	3.01625	3.01012	2.97606
Xalm	0.426395	0.440923	0.433545	0.4388	0.441054	0.439006	0.409249	0.413578	0.411819	0.424199	0.376515	0.235403	0.419756	0.449653	0.394275	0.393342	0.413679	0.404221
Xprp	0.392506	0.381478	0.383022	0.353006	0.358461	0.351935	0.382105	0.380539	0.387504	0.393424	0.390458	0.742635	0.419726	0.379625	0.428773	0.42381	0.404104	0.446799
Xsps	0.0156009	0.0286494	0.0275169	0.0275186	0.0236475	0.0297058	0.011582	0.0106866	0.00942659	0.00925497	0.00795198	0.00434619	0.0229082	0.0267622	0.00659978	0.00616405	0.00737113	0.00634063
Xgrs	0.165498	0.148949	0.155915	0.180675	0.176838	0.179353	0.197064	0.195196	0.19125	0.173123	0.225075	0.0176151	0.13761	0.143959	0.170352	0.176684	0.174846	0.14264
XMg	0.479308	0.463859	0.469064	0.445824	0.448348	0.444957	0.482849	0.479198	0.48479	0.48118	0.509089	0.759311	0.499982	0.457778	0.520958	0.518643	0.494145	0.525016
